# Supplementary material for: Open storm: a complete framework for sensing and control of urban watersheds
Source: Royal Society of Chemistry journal article supplement (doi:10.1039/c7ew00374a), 2017-12-22
Supplement: c7ew00374a1.pdf [file c7ew00374a1.pdf]

ESI link: [open-storm.org](http://open-storm.org)
